# Supplementary material for: Simultaneous electrochemical determination of uric acid and hypoxanthine at a TiO2/graphene quantum dot-modified electrode
Source: publisher site journal article supplement (doi:10.3762/bjnano.15.60), 2024-06-20
Supplement: Additional file 1 [file 2190-4286-15-60-S1.pdf]

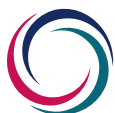

## Supporting Information

for

### **Simultaneous electrochemical determination of uric acid and hypoxanthine at a TiO<sub>2</sub>/graphene quantum dot-modified electrode**

Vu Ngoc Hoang, Dang Thi Ngoc Hoa, Nguyen Quang Man, Le Vu Truong Son, Le Van Thanh Son, Vo Thang Nguyen, Le Thi Hong Phong, Ly Hoang Diem, Kieu Chan Ly, Ho Sy Thang and Dinh Quang Khieu

*Beilstein J. Nanotechnol.* **2024**, *15*, 719–732. [doi:10.3762/bjnano.15.60](https://doi.org/10.3762/bjnano.15.60)

## Additional figures and tables

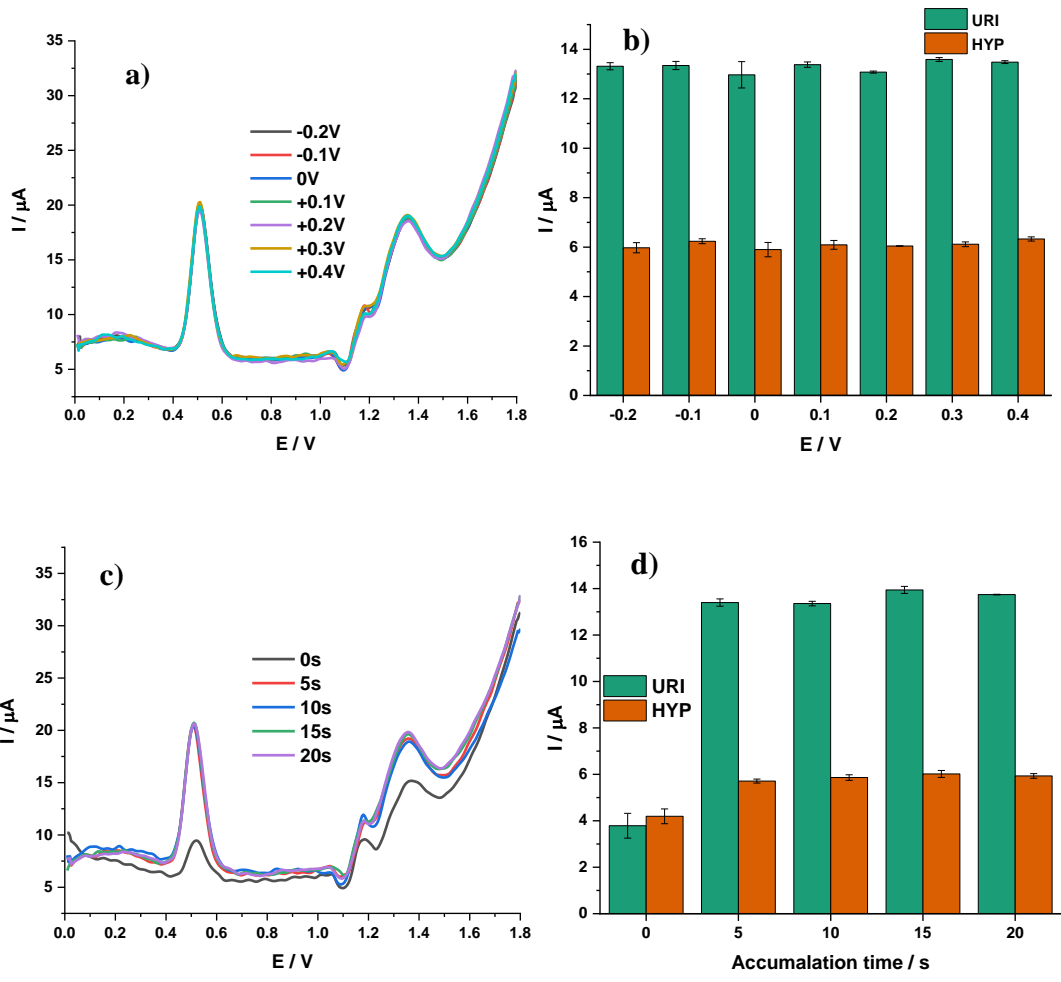

**Figure S1:** a) DPV curves of URI and HYP ( $C_{\text{URI}} = C_{\text{HYP}} = 25 \mu\text{M}$ ) in 0.05 M BRS (pH 3) at (1:4)TiO<sub>2</sub>/GQD/GCE at various accumulation potentials (in the range from -0.2 V to +0.4 V) and b) the dependence of peak current,  $I_p$  on accumulation potential; c) DPV curves of URI and HYP ( $C_{\text{URI}} = C_{\text{HYP}} = 25 \mu\text{M}$ ) in 0.05 M BRS (pH 3) at (1:4)TiO<sub>2</sub>/GQD/GCE with various accumulation time (in the range from 0 to 20 s) at accumulation potential of -0.1V and d) the dependence of  $I_p$  on accumulation time.

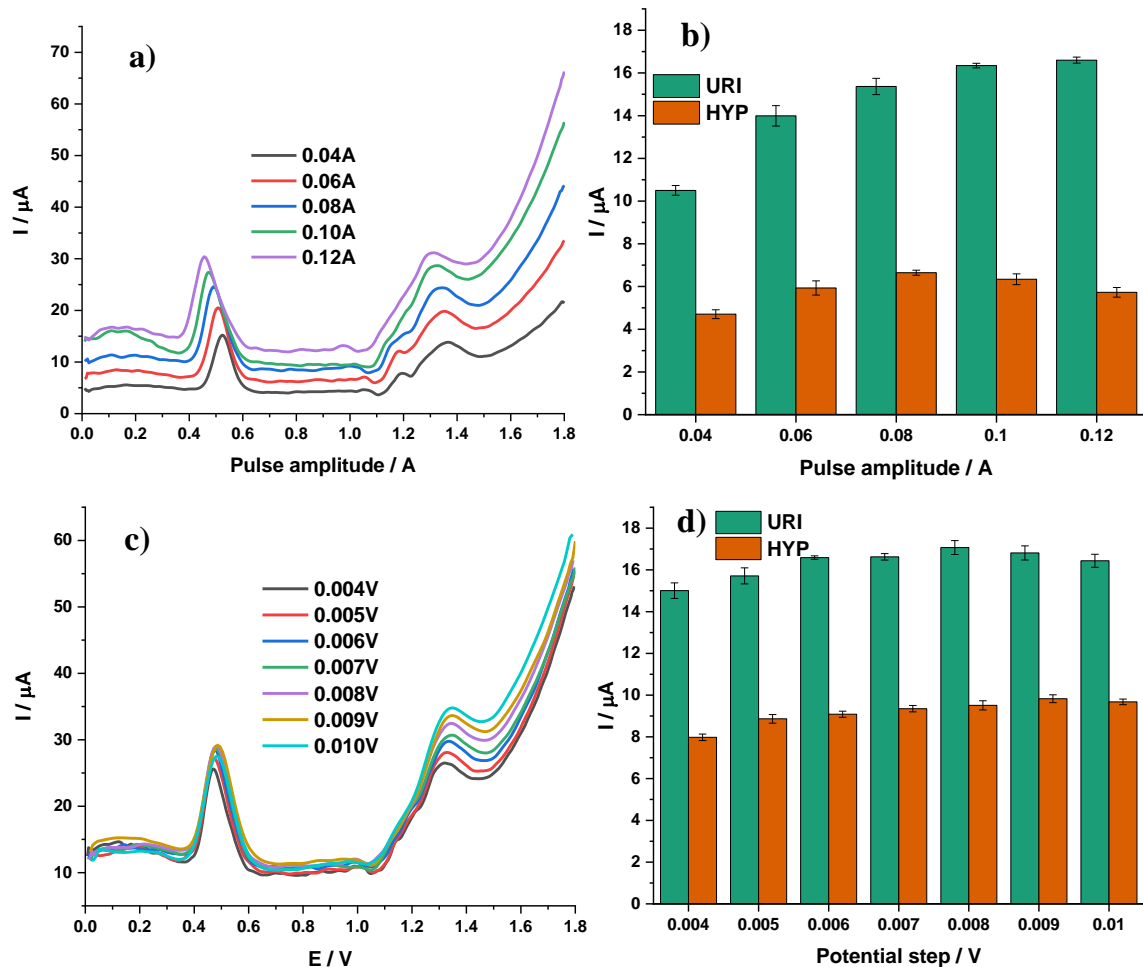

**Figure S2:** a) DPV curves of URI and HYP ( $C_{\text{URI}} = C_{\text{HYP}} = 25 \mu\text{M}$ ) at (1:4)TiO<sub>2</sub>/GQD/GCE in BRS 0.05 M (pH 3) with various pulse amplitudes (0.04 to 0.12A) at the  $-0.1 \text{ V}$  accumulation potential and 15 s accumulation time and b) the dependence of peak currents on pulse amplitude; c) DPV curves of URI and HYP ( $C_{\text{URI}} = C_{\text{HYP}} = 25 \mu\text{M}$ ) at (1:4)TiO<sub>2</sub>/GQD/GCE in BRS 0.05 M (pH 3) with various potential from 0.004 to 0.010 V at  $-0.1 \text{ V}$  accumulation potential, 15 s accumulation time and 0.10 A pulse amplitude and d) the dependence of peak currents on potential step.

**Table S1:** Effect of some interferences on peak current of URI and HYP.

| <b>1. NH<sub>4</sub>Cl</b>                |                |                |               |                                           |                |                |               |
|-------------------------------------------|----------------|----------------|---------------|-------------------------------------------|----------------|----------------|---------------|
| <b>C<sub>NH4Cl</sub>/C<sub>URI</sub></b>  | <b>Ip (μA)</b> | <b>RSD (%)</b> | <b>Re (%)</b> | <b>C<sub>NH4Cl</sub>/C<sub>HYP</sub></b>  | <b>Ip (μA)</b> | <b>RSD (%)</b> | <b>Re (%)</b> |
| 0                                         | 11.66          | 2.53           | 0.00          | 0                                         | 8.11           | 2.41           | 0.00          |
| 10                                        | 11.91          | 2.34           | 2.17          | 10                                        | 8.34           | 2.01           | 2.88          |
| 40                                        | 11.75          | 1.19           | 0.77          | 40                                        | 8.24           | 2.14           | 1.58          |
| 60                                        | 11.52          | 1.82           | -1.18         | 60                                        | 8.12           | 2.48           | 0.20          |
| 80                                        | 11.53          | 1.85           | -1.16         | 80                                        | 8.11           | 1.02           | 0.04          |
| 100                                       | 11.17          | 1.29           | -4.25         | 100                                       | 7.88           | 1.25           | -2.86         |
| <b>2. KCl</b>                             |                |                |               |                                           |                |                |               |
| <b>C<sub>KCl</sub>/C<sub>URI</sub></b>    | <b>Ip (μA)</b> | <b>RSD (%)</b> | <b>Re (%)</b> | <b>C<sub>KCl</sub>/C<sub>HYP</sub></b>    | <b>Ip (μA)</b> | <b>RSD (%)</b> | <b>Re (%)</b> |
| 0                                         | 11.10          | 1.82           | 0.00          | 0                                         | 7.88           | 1.25           | 0.00          |
| 10                                        | 11.32          | 4.62           | 1.98          | 10                                        | 7.86           | 0.81           | -0.25         |
| 40                                        | 11.40          | 3.35           | 2.70          | 40                                        | 7.81           | 1.00           | -0.89         |
| 60                                        | 11.35          | 1.68           | 2.21          | 60                                        | 7.81           | 2.90           | -0.83         |
| 80                                        | 11.02          | 1.89           | -0.72         | 80                                        | 7.99           | 0.29           | 1.50          |
| 100                                       | 10.96          | 4.32           | -1.31         | 100                                       | 7.79           | 1.82           | -1.08         |
| <b>3. Na<sub>2</sub>SO<sub>4</sub></b>    |                |                |               |                                           |                |                |               |
| <b>C<sub>Na2SO4</sub>/C<sub>URI</sub></b> | <b>Ip (μA)</b> | <b>RSD (%)</b> | <b>Re (%)</b> | <b>C<sub>Na2SO4</sub>/C<sub>HYP</sub></b> | <b>Ip (μA)</b> | <b>RSD (%)</b> | <b>Re (%)</b> |
| 0                                         | 11.19          | 3.95           | 0.00          | 0                                         | 7.79           | 2.94           | 0.00          |
| 10                                        | 11.02          | 1.66           | -1.52         | 10                                        | 7.89           | 1.10           | 1.28          |
| 40                                        | 10.80          | 2.16           | -3.49         | 40                                        | 7.68           | 2.09           | -1.45         |
| 60                                        | 11.07          | 1.61           | -1.04         | 60                                        | 7.89           | 1.59           | 1.24          |
| 80                                        | 10.90          | 1.20           | -2.64         | 80                                        | 7.67           | 1.97           | -1.54         |
| 100                                       | 10.65          | 3.62           | -4.80         | 100                                       | 7.55           | 1.03           | -3.05         |
| <b>4. NH<sub>4</sub>NO<sub>3</sub></b>    |                |                |               |                                           |                |                |               |
| <b>C<sub>NH4NO3</sub>/C<sub>URI</sub></b> | <b>Ip (μA)</b> | <b>RSD (%)</b> | <b>Re (%)</b> | <b>C<sub>NH4NO3</sub>/C<sub>HYP</sub></b> | <b>Ip (μA)</b> | <b>RSD (%)</b> | <b>Re (%)</b> |
| 0                                         | 10.58          | 4.18           | 0.00          | 0                                         | 7.59           | 1.19           | 0.00          |
| 10                                        | 10.54          | 2.12           | -0.38         | 10                                        | 7.61           | 2.17           | 0.30          |
| 40                                        | 10.49          | 2.68           | -0.85         | 40                                        | 7.45           | 1.12           | -1.78         |

|                                                     |                |                |               |                                                     |                |                |               |
|-----------------------------------------------------|----------------|----------------|---------------|-----------------------------------------------------|----------------|----------------|---------------|
| 60                                                  | 10.45          | 3.86           | -1.16         | 60                                                  | 7.51           | 0.67           | -1.09         |
| 80                                                  | 10.37          | 4.68           | -1.94         | 80                                                  | 7.41           | 2.29           | -2.30         |
| 100                                                 | 10.37          | 4.57           | -1.91         | 100                                                 | 7.44           | 2.11           | -1.94         |
| <b>5. CaCl<sub>2</sub></b>                          |                |                |               |                                                     |                |                |               |
| <b>C<sub>CaCl<sub>2</sub></sub>/C<sub>URI</sub></b> | <b>Ip (μA)</b> | <b>RSD (%)</b> | <b>Re (%)</b> | <b>C<sub>CaCl<sub>2</sub></sub>/C<sub>HYP</sub></b> | <b>Ip (μA)</b> | <b>RSD (%)</b> | <b>Re (%)</b> |
| 0                                                   | 10.15          | 2.63           | 0.00          | 0                                                   | 7.43           | 1.93           | 0.00          |
| 10                                                  | 10.34          | 2.54           | 1.82          | 10                                                  | 7.50           | 1.47           | 0.94          |
| 40                                                  | 10.40          | 1.71           | 2.46          | 40                                                  | 7.40           | 0.72           | -0.40         |
| 60                                                  | 10.12          | 2.88           | -0.32         | 60                                                  | 7.14           | 1.90           | -3.84         |
| 80                                                  | 9.99           | 0.26           | -1.58         | 80                                                  | 7.32           | 0.76           | -1.45         |
| 100                                                 | 10.25          | 0.95           | 1.02          | 100                                                 | 7.15           | 1.19           | -3.74         |
| <b>6. ZnCl<sub>2</sub></b>                          |                |                |               |                                                     |                |                |               |
| <b>C<sub>ZnCl<sub>2</sub></sub>/C<sub>URI</sub></b> | <b>Ip (μA)</b> | <b>RSD (%)</b> | <b>Re (%)</b> | <b>C<sub>ZnCl<sub>2</sub></sub>/C<sub>HYP</sub></b> | <b>Ip (μA)</b> | <b>RSD (%)</b> | <b>Re (%)</b> |
| 0                                                   | 10.25          | 1.02           | 0.00          | 0                                                   | 7.25           | 1.08           | 0.00          |
| 10                                                  | 9.96           | 3.20           | -2.84         | 10                                                  | 7.21           | 1.40           | -0.63         |
| 40                                                  | 9.86           | 2.98           | -3.81         | 40                                                  | 7.06           | 1.91           | -2.70         |
| 60                                                  | 10.14          | 1.12           | -1.07         | 60                                                  | 7.12           | 0.86           | -1.87         |
| 80                                                  | 9.91           | 2.80           | -3.29         | 80                                                  | 7.22           | 1.53           | -0.49         |
| 100                                                 | 10.00          | 7.35           | -2.42         | 100                                                 | 6.93           | 3.56           | -4.40         |
| <b>7. Glucose</b>                                   |                |                |               |                                                     |                |                |               |
| <b>C<sub>GLC</sub>/C<sub>URI</sub></b>              | <b>Ip (μA)</b> | <b>RSD (%)</b> | <b>Re (%)</b> | <b>C<sub>GLC</sub>/C<sub>HYP</sub></b>              | <b>Ip (μA)</b> | <b>RSD (%)</b> | <b>Re (%)</b> |
| 0                                                   | 10.00          | 7.37           | 0.00          | 0                                                   | 6.97           | 2.91           | 0.00          |
| 10                                                  | 9.74           | 2.73           | -2.55         | 10                                                  | 6.93           | 2.38           | -0.54         |
| 40                                                  | 9.72           | 3.45           | -2.78         | 40                                                  | 7.07           | 1.10           | 1.48          |
| 60                                                  | 9.78           | 1.90           | -2.18         | 60                                                  | 6.85           | 1.55           | -1.69         |
| 80                                                  | 9.53           | 1.86           | -4.63         | 80                                                  | 6.89           | 2.12           | -1.18         |
| 100                                                 | 9.56           | 4.38           | -4.40         | 100                                                 | 6.87           | 1.42           | -1.40         |
| <b>8. Glutamic acid</b>                             |                |                |               |                                                     |                |                |               |
| <b>C<sub>GLA</sub>/C<sub>URI</sub></b>              | <b>Ip (μA)</b> | <b>RSD (%)</b> | <b>Re (%)</b> | <b>C<sub>GLA</sub>/C<sub>HYP</sub></b>              | <b>Ip (μA)</b> | <b>RSD (%)</b> | <b>Re (%)</b> |
| 0                                                   | 9.50           | 4.06           | 0.00          | 0                                                   | 6.63           | 3.02           | 0.00          |

|                                        |                |                |               |                                        |                |                |               |
|----------------------------------------|----------------|----------------|---------------|----------------------------------------|----------------|----------------|---------------|
| 10                                     | 9.53           | 1.71           | 0.32          | 10                                     | 6.77           | 1.56           | 2.11          |
| 40                                     | 9.59           | 1.85           | 1.02          | 40                                     | 6.84           | 1.33           | 3.12          |
| 60                                     | 9.44           | 1.47           | -0.57         | 60                                     | 6.85           | 4.09           | 3.32          |
| 80                                     | 9.44           | 3.60           | -0.60         | 80                                     | 6.71           | 1.82           | 1.21          |
| 100                                    | 9.36           | 2.49           | -1.49         | 100                                    | 6.62           | 2.05           | -0.11         |
| <b>9. Urea</b>                         |                |                |               |                                        |                |                |               |
| <b>C<sub>URE</sub>/C<sub>URI</sub></b> | <b>Ip (µA)</b> | <b>RSD (%)</b> | <b>Re (%)</b> | <b>C<sub>URE</sub>/C<sub>HYP</sub></b> | <b>Ip (µA)</b> | <b>RSD (%)</b> | <b>Re (%)</b> |
| 0                                      | 9.38           | 2.31           | 0.00          | 0                                      | 6.62           | 2.05           | 0.00          |
| 10                                     | 9.30           | 2.48           | -0.82         | 10                                     | 6.56           | 1.67           | -0.99         |
| 40                                     | 9.28           | 2.75           | -1.05         | 40                                     | 6.64           | 0.67           | 0.19          |
| 60                                     | 9.12           | 1.04           | -2.75         | 60                                     | 6.47           | 4.17           | -2.30         |
| 80                                     | 9.36           | 1.74           | -0.21         | 80                                     | 6.52           | 3.50           | -1.59         |
| 100                                    | 9.23           | 0.91           | -1.55         | 100                                    | 6.40           | 1.46           | -3.40         |
| <b>10. L-cysteine</b>                  |                |                |               |                                        |                |                |               |
| <b>CLCY/C<sub>URI</sub></b>            | <b>Ip (µA)</b> | <b>RSD (%)</b> | <b>Re (%)</b> | <b>CLCY/C<sub>HYP</sub></b>            | <b>Ip (µA)</b> | <b>RSD (%)</b> | <b>Re (%)</b> |
| 0                                      | 9.24           | 0.85           | 0.00          | 0                                      | 6.38           | 0.66           | 0.00          |
| 10                                     | 9.49           | 1.56           | 2.76          | 10                                     | 6.49           | 3.83           | 1.71          |
| 40                                     | 9.07           | 1.95           | -1.82         | 40                                     | 6.69           | 2.12           | 4.90          |
| 60                                     | 8.95           | 2.52           | -3.14         | 60                                     | 7.15           | 1.92           | <b>12.15</b>  |
| 80                                     | 9.02           | 4.01           | -2.29         | 80                                     | 6.99           | 1.19           | <b>9.55</b>   |
| 100                                    | 8.83           | 3.74           | -4.41         | 100                                    | 7.23           | 1.99           | <b>13.37</b>  |
| <b>11. Xanthine</b>                    |                |                |               |                                        |                |                |               |
| <b>C<sub>XTE</sub>/C<sub>URI</sub></b> | <b>Ip (µA)</b> | <b>RSD (%)</b> | <b>Re (%)</b> | <b>C<sub>XTE</sub>/C<sub>HYP</sub></b> | <b>Ip (µA)</b> | <b>RSD (%)</b> | <b>Re (%)</b> |
| 0                                      | 8.58           | 3.37           | 0.00          | 0                                      | 6.32           | 1.43           | 0.00          |
| 10                                     | 8.30           | 1.35           | -3.25         | 10                                     | 6.35           | 4.98           | 0.47          |
| 40                                     | 8.19           | 2.12           | -4.57         | 40                                     | 6.18           | 4.21           | -2.21         |
| 60                                     | 8.16           | 2.77           | -4.92         | 60                                     | 6.17           | 2.43           | -2.26         |
| 80                                     | 7.50           | 5.86           | <b>-12.57</b> | 80                                     | 6.01           | 2.02           | -4.82         |
| 100                                    | 7.26           | 8.60           | <b>-15.41</b> | 100                                    | 6.04           | 1.73           | -4.35         |
